# Supplementary material
Source: ML conference proceedings conference paper supplement (https://openreview.net/forum?id=MRrR2HG0dU)
Supplement: supplementary_material [file attachment]

# Rolling Diffusion Policy

## Enhancing Efficiency and Temporal Awareness

Chanhyuk Jung<sup>1\*</sup>, Sangwon Kim<sup>2\*</sup>, Dasom Ahn<sup>1</sup>, In-su Jang<sup>2</sup>, Kwang-Ju Kim<sup>2</sup>, Sungkeun Yoo<sup>1</sup>, Byoung Chul Ko<sup>1</sup>

<sup>1</sup>Keimyung University, South Korea

<sup>2</sup>ETRI - Electronics and Telecommunications Research Institute, South Korea

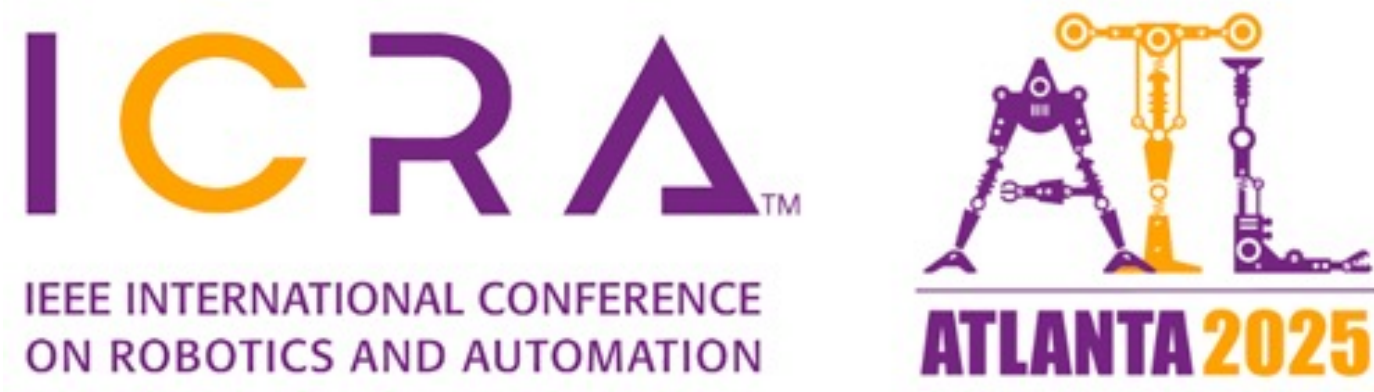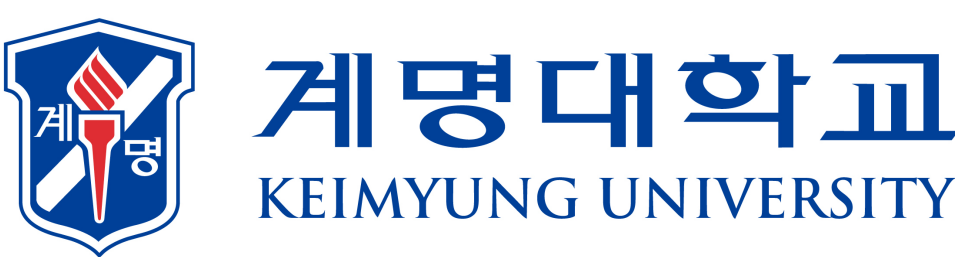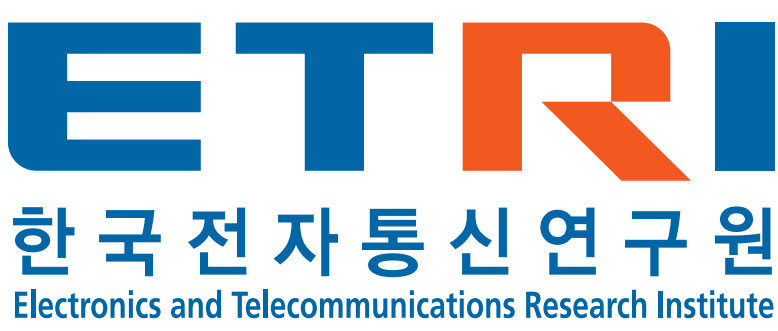

### 1. Motivation

Recent advances in diffusion models have enabled high-quality robotic trajectory generation

However, previous diffusion policies suffer from two major limitations:

- **High Computational Cost:** They require hundreds of iterative denoising steps, making real-time inference infeasible
- **Lack of Temporal Awareness:** Standard diffusion policies ignore growing future uncertainty

**Our Goal:** Develop a fast, temporally-aware diffusion policy for real-time robotic control

### 3. Method: Rolling Diffusion Policy (RDP)

**Core Idea:** Real-time sampling through sliding-window denoising and rolling updates.

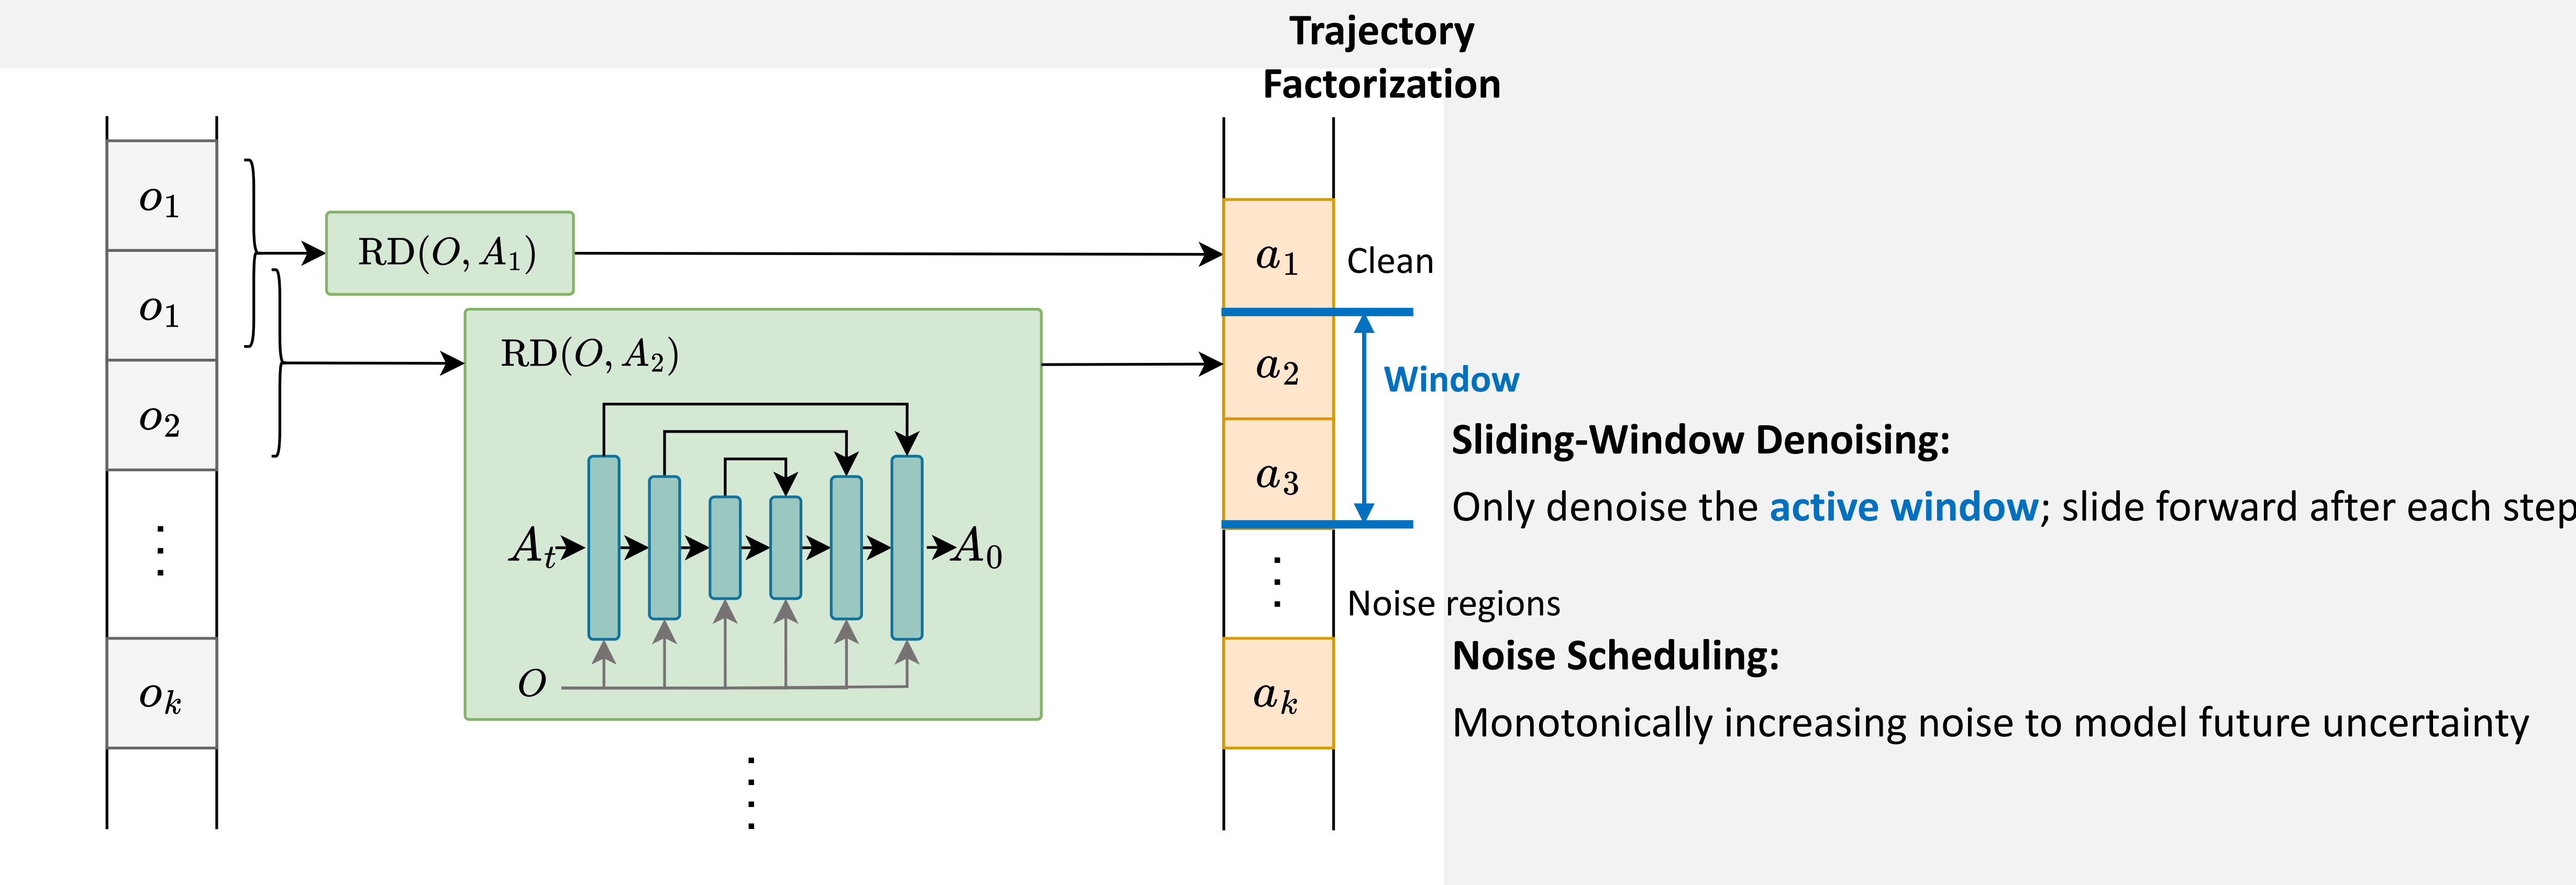

**Result:** Single evaluation per action, fast yet high-quality generation.

### 5. Visualization

**Takeaways:**

- Stable long-horizon rollouts
- Computationally efficient sliding-window denoising

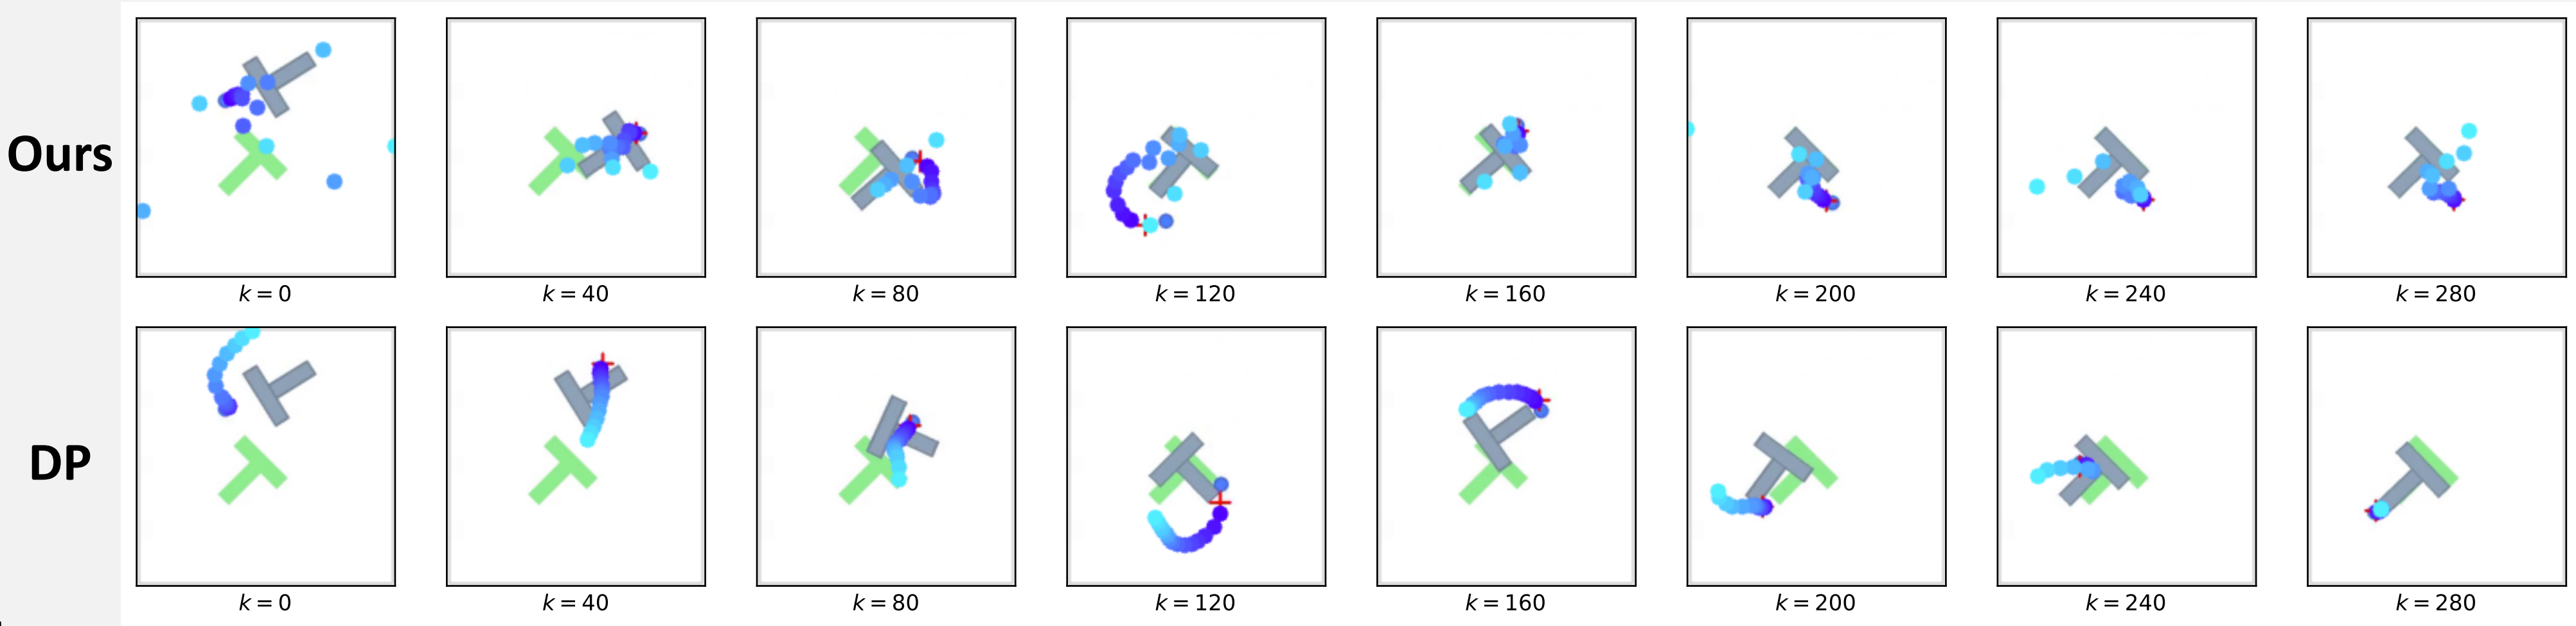

### 2. Key Contributions

- **Rolling Diffusion Mechanism:** Sliding-window denoising for temporally coherent action refinement
- **Temporal Uncertainty Modeling:** Increasing noise for future actions
- **Real-Time Inference:** Single-step action generation, achieving >100X faster inference
- **Superior Performance:** Competitive or improved results on Push-T benchmark

### 4. Results

**Benchmark:** Push-T hybrid (visuomotor control)

**Quantitative Results:**

| Models                               | Avg. score  | Latency (ms) |
|--------------------------------------|-------------|--------------|
| Diffusion Policy (DP) [1]            | 0.91        | 110          |
| Consistency Policy (CP) [7]          | 0.75        | 2            |
| Streaming Diffusion Policy (SDP) [5] | 0.84        | 7            |
| Ours                                 | <b>0.88</b> | <b>1</b>     |

**Observations:**

- High action quality (close to DP)
- Drastic latency reduction
- Real-time action generation with single evaluation

### 6. Conclusion and Future Directions

**Conclusion:**

Rolling Diffusion Policy (RDP) enables real-time, temporally-aware robotic action generation with high efficiency

**Future Directions:**

- Dynamic and complex environments
- Stability over long-horizon rollouts
- Integration with hierarchical task planners
